# Supplementary material for: Trace F-doped Co3O4 nanoneedles for enhanced acidic water oxidation activity via promoting OH coverage
Source: Royal Society of Chemistry journal article supplement (doi:10.1039/d4gc01895h), 2024-01-01
Supplement: d4gc01895h1.pdf [file d4gc01895h1.pdf]

## Supporting Information

### Trace F-doped $\text{Co}_3\text{O}_4$ nanoneedles for enhanced acidic water oxidation activity via promoting OH coverage

Genyan Hao<sup>a,#</sup>, Tao Zhao<sup>b,c,#</sup>, Qiang Fang<sup>b,c,#</sup>, Yunzhen Jia<sup>b,c</sup>, Dandan Li<sup>d</sup>, Dazhong  
Zhong<sup>b,c,\*</sup>, Jinping Li<sup>b,c</sup>, Qiang Zhao<sup>b,c,\*</sup>

<sup>a</sup> Shanxi College of Technology, Shuozhou 036000, Shanxi, P.R. China.

<sup>b</sup> College of Chemical Engineering and Technology, Taiyuan University of  
Technology, Taiyuan 030024, Shanxi, P.R. China.

<sup>c</sup> Shanxi Key Laboratory of Gas Energy Efficient and Clean Utilization, Taiyuan  
030024, Shanxi, P.R. China.

<sup>d</sup> Shandong Provincial Key Laboratory of Chemical Energy Storage and Novel Cell  
Technology, School of Chemistry and Chemical Engineering, Liaocheng University,  
Liaocheng 252059, Shandong, P.R. China.

# These authors contributed equally to this work.

\*Corresponding authors.

E-mail addresses: zhaoliang@tyut.edu.cn (Q. Zhao); zhongdazhong@tyut.edu.cn  
(D.Z. Zhong).

## *1. Membrane electrode assembly (MEA) testing*

F-Co<sub>3</sub>O<sub>4</sub>/CP (IrO<sub>2</sub>/CP) and commercial Pt/C/CP were used as anode and cathode for water splitting test, respectively (0.5 M H<sub>2</sub>SO<sub>4</sub> and 25 °C). In addition, F-Co<sub>3</sub>O<sub>4</sub>/CP and commercial Ag NPs were used as anode and cathode for CO<sub>2</sub>RR test, respectively (0.5 M H<sub>2</sub>SO<sub>4</sub> and 25 °C). Anion exchange membranes (117) were used to separate the side of the anode and cathode.

## *2. Calculation methods*

The Vienna ab initio simulation package (VASP) were used for spin-polarized and periodic density function theory (DFT) calculations. Exchange-correlation was treated within the generalized approximation of Perdew-Burke-Ernzerhof (GGA-PBE). A cutoff energy was set as 450 eV to ensure accurate energies with errors of less than 1 meV per atom. The self-consistency of the electron which defined by energy threshold established as 10<sup>-4</sup> eV, whereas geometry optimization was converged when the forces with energy change were lower than 0.05 eV/Å. At the same time, the Co<sub>3</sub>O<sub>4</sub> (311) model and 15 Å vacuum layer which make sure that there is no interaction between adjacent images were built by Materials Studio. And the discussion of frequency analysis and zero-point vibrational energies (ZPE) is used by VASPKIT for thermodynamic corrections and stability discussions of intermediate adsorption. A 5×5×5 Monkhorst-Pack k-point grid was used for the optimization of the unit structure, determined by minimizing the general energy of the unit cell by means of conjugated gradient algorithm. In addition, the corrections of Hubbard term (PBE+U) and dispersion (DFT+D3) was tested on account of the gradient approximation (GGA)

functional underrate the energy of the 4d orbital and the band gap of the homologous material. To describe this effect,  $U_{\text{eff}}$  was set as 4 eV for Co-3d, and a  $2 \times 2 \times 1$  Monkhorst-Pack k-point grids was used for the optimization of  $\text{Co}_3\text{O}_4$  (311) surface model and adsorption process of DFT calculations, while  $4 \times 4 \times 1$  for density of states (DOS) and differential charge calculations.

The electron reaction paths of oxygen evolution reaction (OER) in our DFT calculation follows the process below:

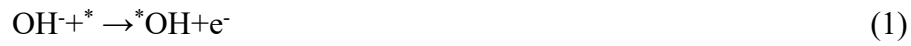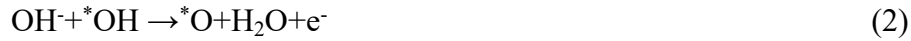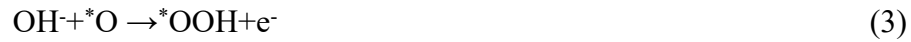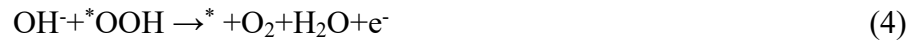

The Gibbs free energy ( $\Delta G$ ) of each oxygen evolution reaction steps is calculated by the following formula:

$$\Delta G = \Delta E_{\text{DFT}} + \Delta \text{ZPE} - T\Delta S - eU$$

Where  $\Delta E_{\text{DFT}}$ ,  $\Delta \text{ZPE}$ ,  $\Delta S$  are the change of DFT total energy, zero-point energy, and entropy from the initial to the final state;  $U$  is the electrode potential and  $e$  is the transferred charge in the reaction.

The adsorption energies of  $* \text{OH}$ ,  $* \text{O}$  and  $* \text{OOH}$  are calculated by their DFT energy:

$$\Delta E_{\text{ads}} = E(* \text{OH}) - E_{\text{slab}} - E(\text{OH})$$

Where  $E_{\text{slab}}$  and  $E(\text{OH})$  are considered as the DFT calculated energy for pure slab and the DFT energy for small molecules, respectively.

### 3. Calculation $C_{dl}$

$C_{dl}$ : multi-turn CV curves were acquired at scan rates from 100 to 500  $\text{mV s}^{-1}$  in the non-Faradaic region (0.4 - 0.5 V vs. Hg/Hg<sub>2</sub>SO<sub>4</sub>), then the slope was obtained from a linear plot of the capacitive currents ( $(\Delta j = j_{anodic} - j_{cathodic})/2$ ) versus scan rate, and the obtained slope was the  $C_{dl}$  value <sup>1</sup>.

#### 4. Calculation ECSA

ECSA: the ECSA was obtained according to the formula:  $C_{dl}/C_s$ , where  $C_s$  indicates the specific capacitance and is 0.06  $\text{mF cm}^{-2}$  in H<sub>2</sub>SO<sub>4</sub> <sup>2</sup>.

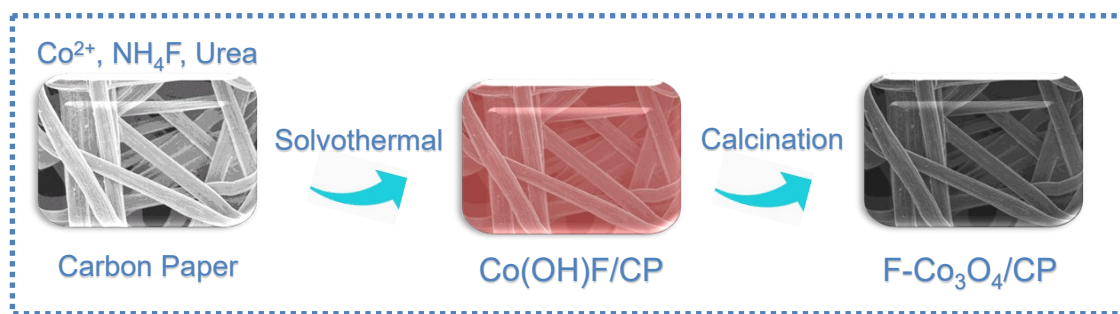

**Fig. S1.** Schematic illustration of F-Co<sub>3</sub>O<sub>4</sub>/CP (3 cm × 5 cm).

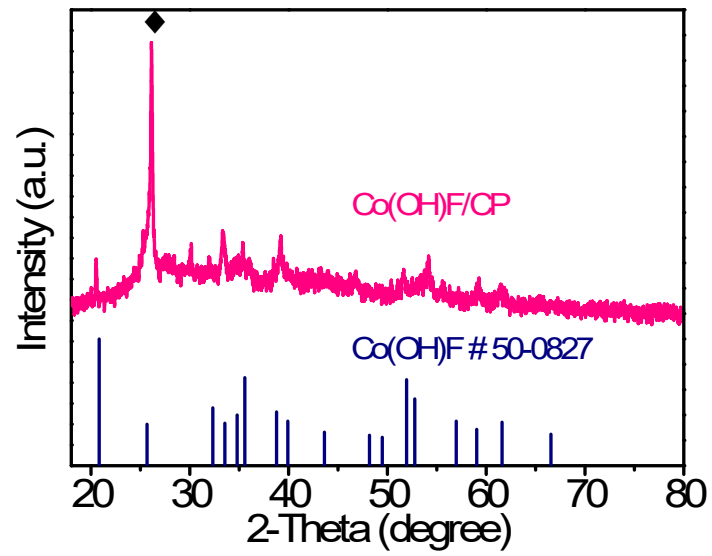

**Fig. S2.** XRD patterns of Co(OH)F/CP (26 ° belongs to CP peak).

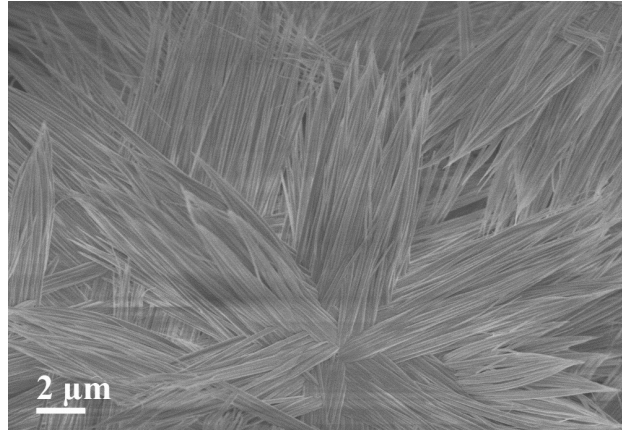

**Fig. S3.** SEM image of Co(OH)F/CP.

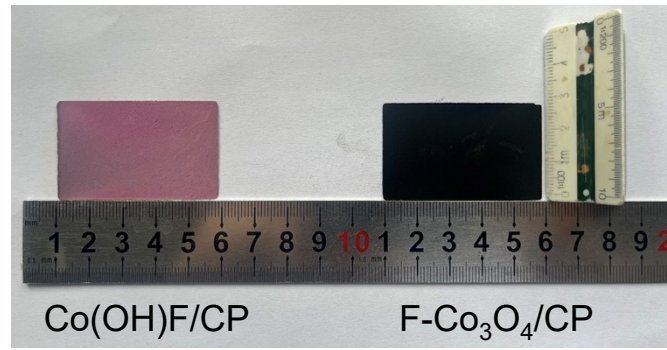

**Fig. S4.** Optical images of Co(OH)F/CP and F-Co<sub>3</sub>O<sub>4</sub>/CP (3 cm × 5 cm).



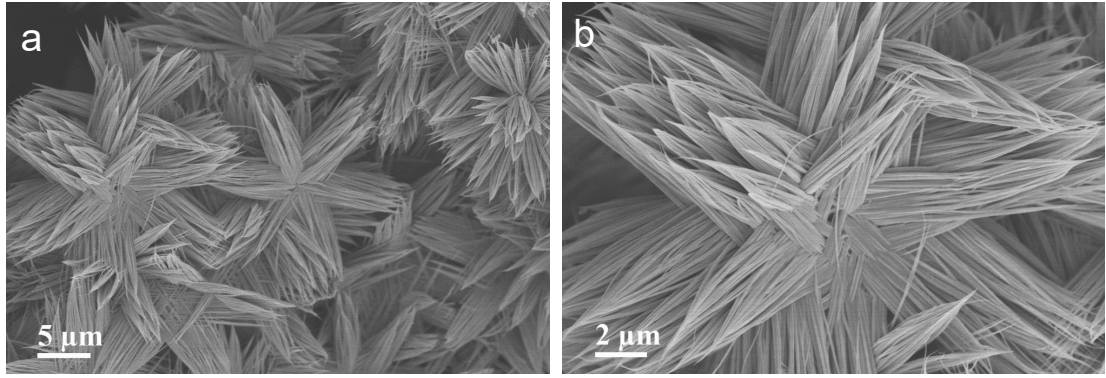

**Fig. S5.** SEM images of F-Co<sub>3</sub>O<sub>4</sub>/CP.

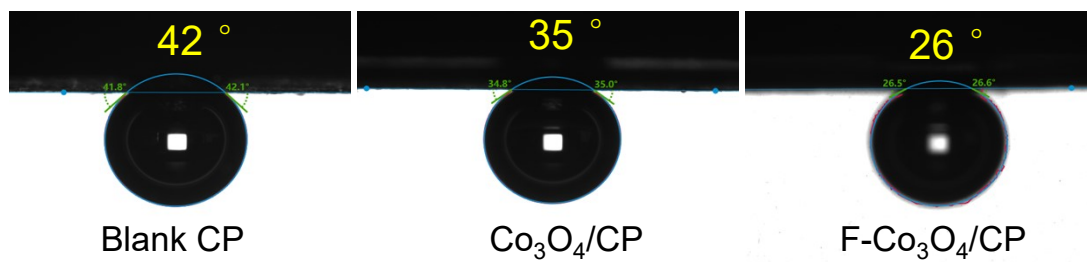

**Fig. S6.** CA of Blank CP, Co<sub>3</sub>O<sub>4</sub>/CP and F-Co<sub>3</sub>O<sub>4</sub>/CP.

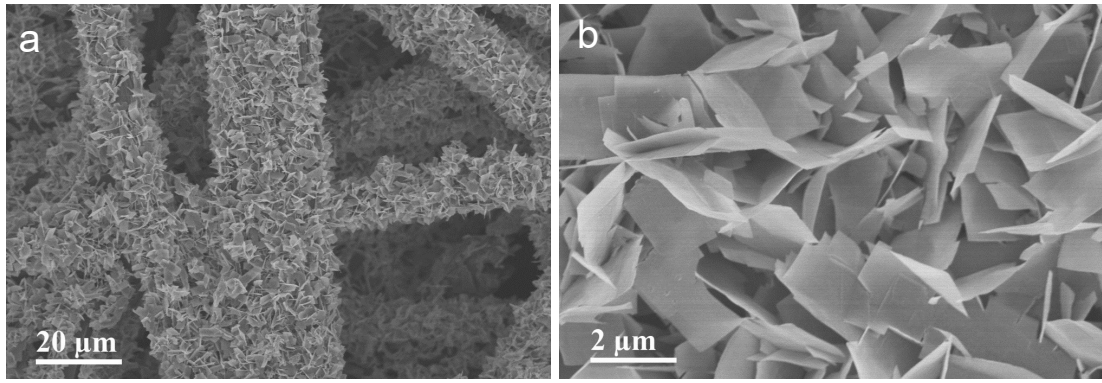

**Fig. S7.** SEM images of Co<sub>3</sub>O<sub>4</sub>/CP.

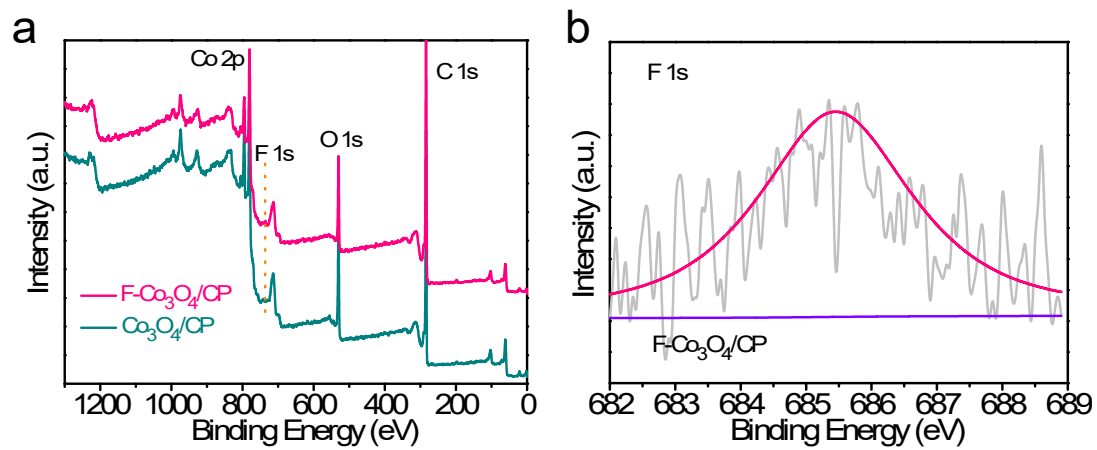

**Fig. S8.** (a) Fully measured XPS spectra of F-Co<sub>3</sub>O<sub>4</sub>/CP and Co<sub>3</sub>O<sub>4</sub>/CP, (b) F 1s XPS spectra of F-Co<sub>3</sub>O<sub>4</sub>/CP.

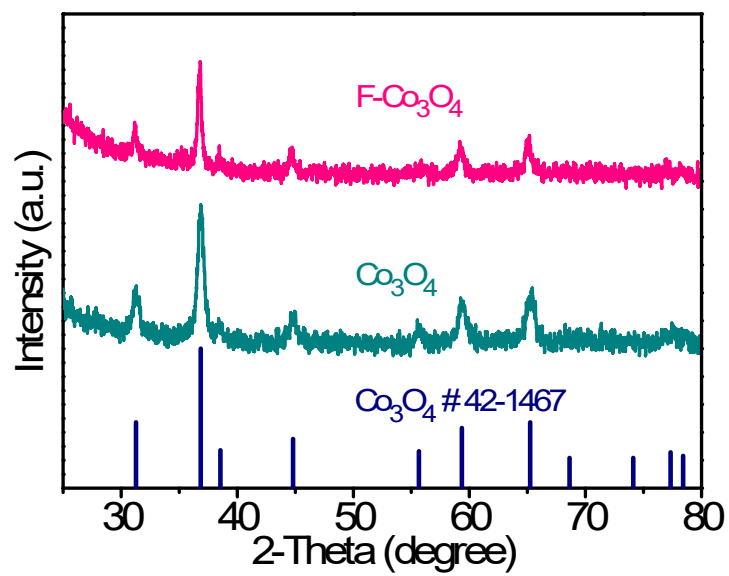

Fig. S9. XRD patterns of Co<sub>3</sub>O<sub>4</sub> powder and F-Co<sub>3</sub>O<sub>4</sub> powder.

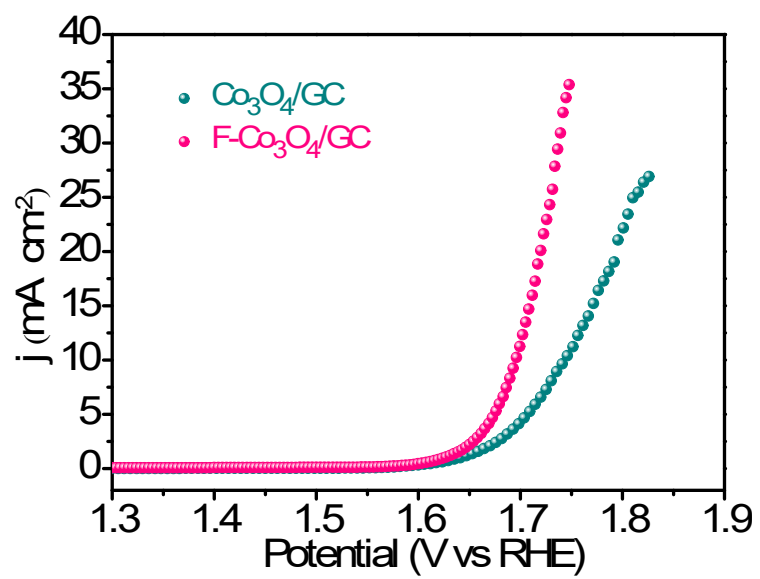

**Fig. S10.** LSV curves of Co<sub>3</sub>O<sub>4</sub> powder and F-Co<sub>3</sub>O<sub>4</sub> powder on GC.

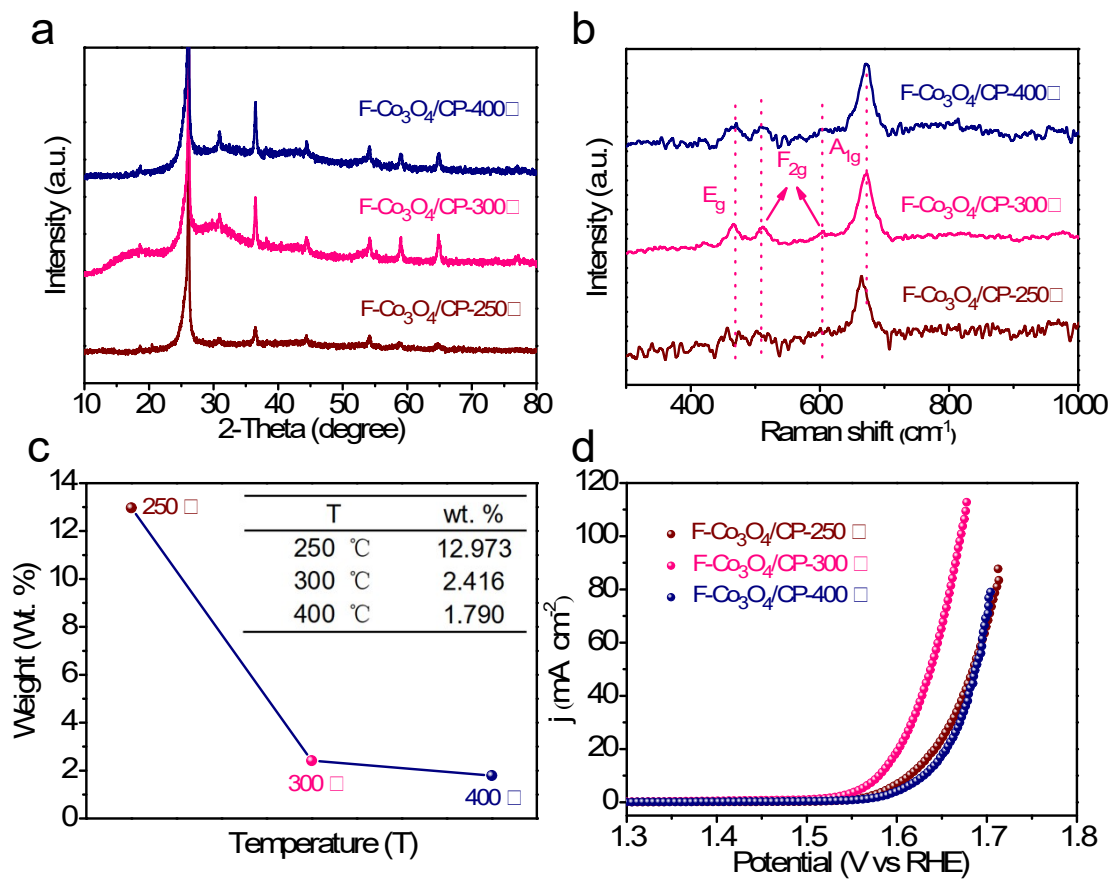

**Fig. S11.** (a) XRD patterns, (b) Raman spectra, (c) EDS data, (b) LSV curves for F-Co<sub>3</sub>O<sub>4</sub>/CP with different calcination temperatures.

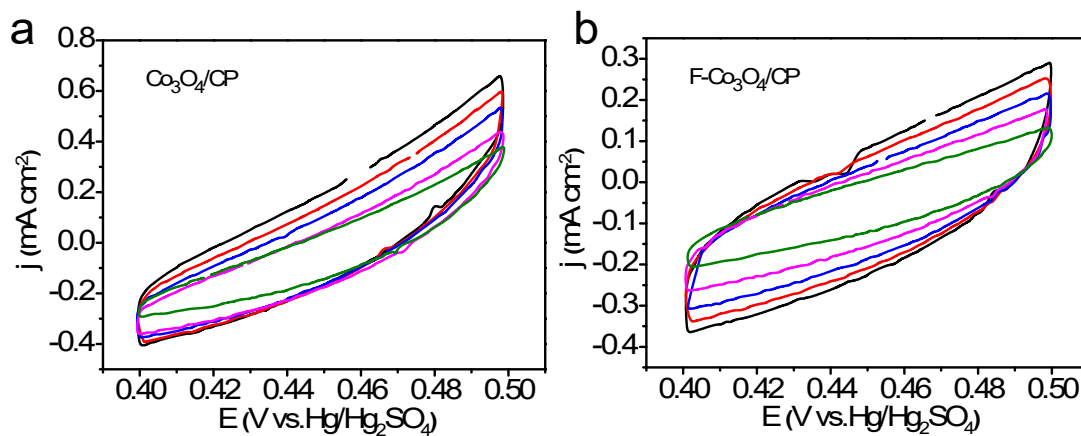

**Fig. S12.** CV curves at various scan rates (100, 200, 300, 400 and 500  $\text{mV s}^{-1}$ ) in the potential range of 0.40 – 0.50 V vs  $\text{Hg/Hg}_2\text{SO}_4$  for  $\text{Co}_3\text{O}_4/\text{CP}$  and  $\text{F-Co}_3\text{O}_4/\text{CP}$ .



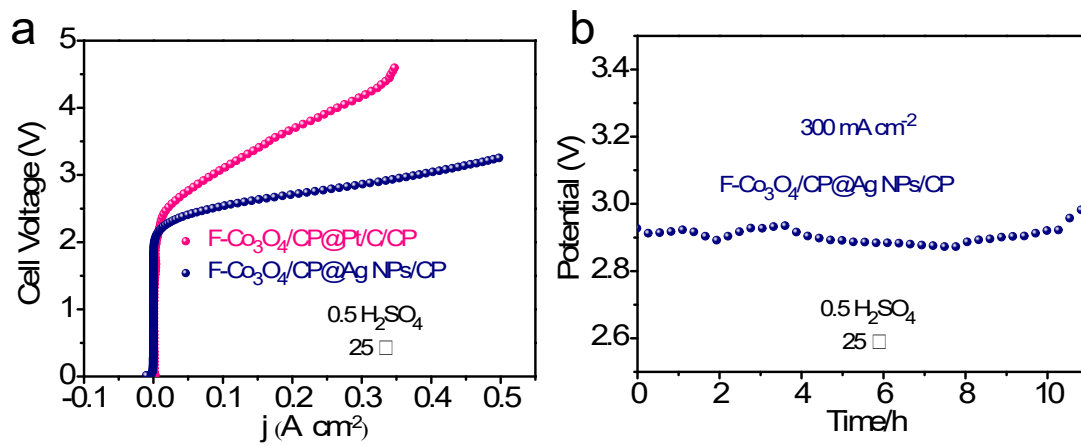

**Fig. S13.** (a) Polarization curves of the MEA using Pt/C/CP (Ag NPs/CP) for the HER (CO<sub>2</sub>RR) and F-Co<sub>3</sub>O<sub>4</sub>/CP for the OER (0.5 M H<sub>2</sub>SO<sub>4</sub> and 25 °C); (b) stability test at 300 mA cm<sup>-2</sup> (0.5 M H<sub>2</sub>SO<sub>4</sub> and 25 °C).

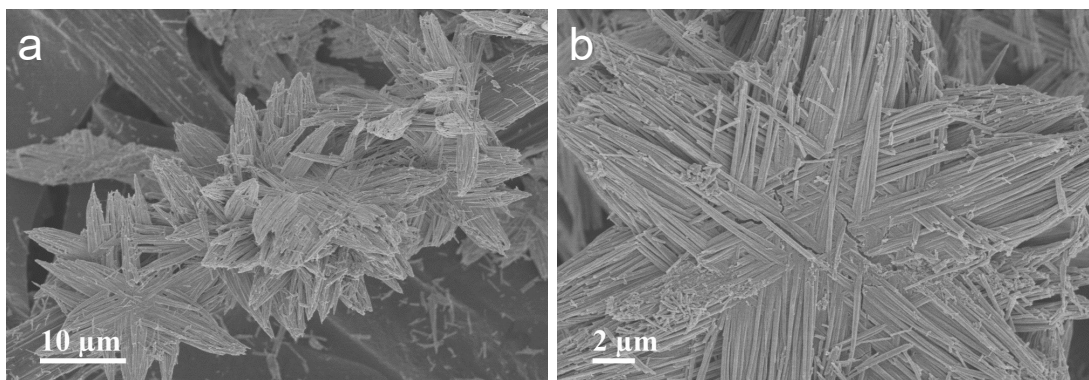

**Fig. S14.** SEM images of F-Co<sub>3</sub>O<sub>4</sub>/CP after OER.

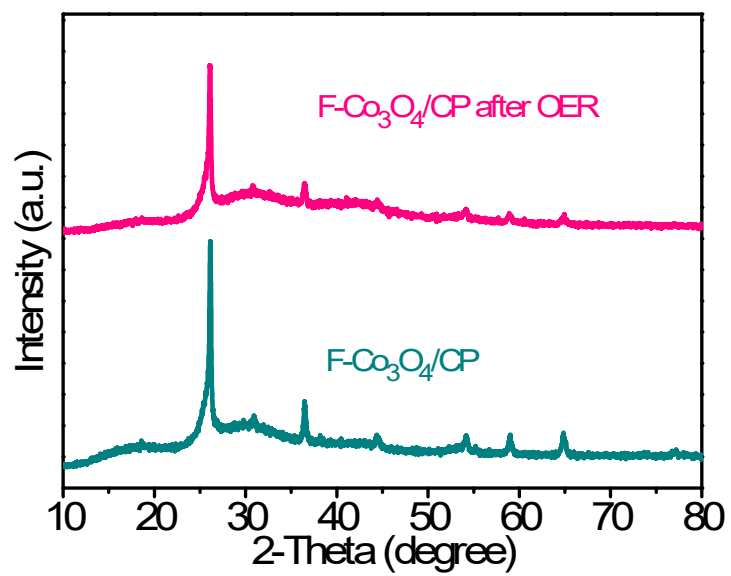

Fig. S15. XRD patterns of F-Co<sub>3</sub>O<sub>4</sub>/CP after OER.

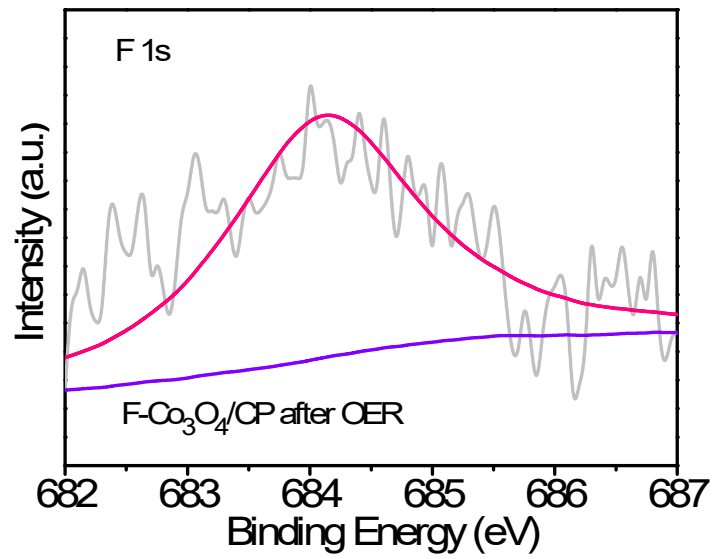

**Fig. S16.** F 1s XPS spectra of F-Co<sub>3</sub>O<sub>4</sub>/CP after OER.

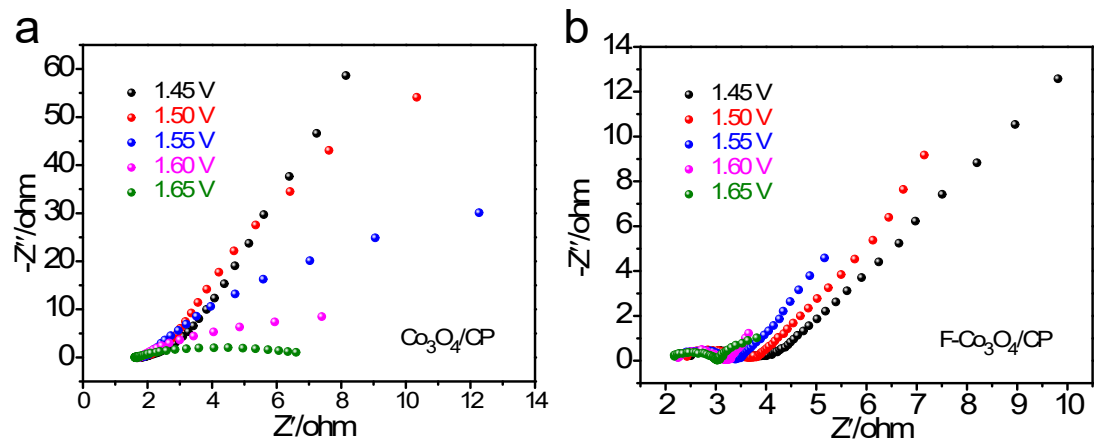

**Fig. S17.** EIS plots for  $\text{Co}_3\text{O}_4/\text{CP}$  and  $\text{F-Co}_3\text{O}_4/\text{CP}$  at various electrochemical potentials.

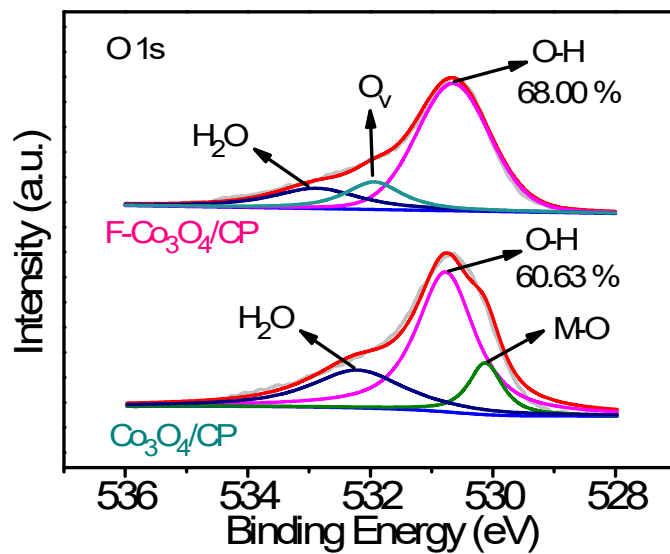

Fig. S18. O 1s XPS spectra of F-Co<sub>3</sub>O<sub>4</sub>/CP and Co<sub>3</sub>O<sub>4</sub>/CP.

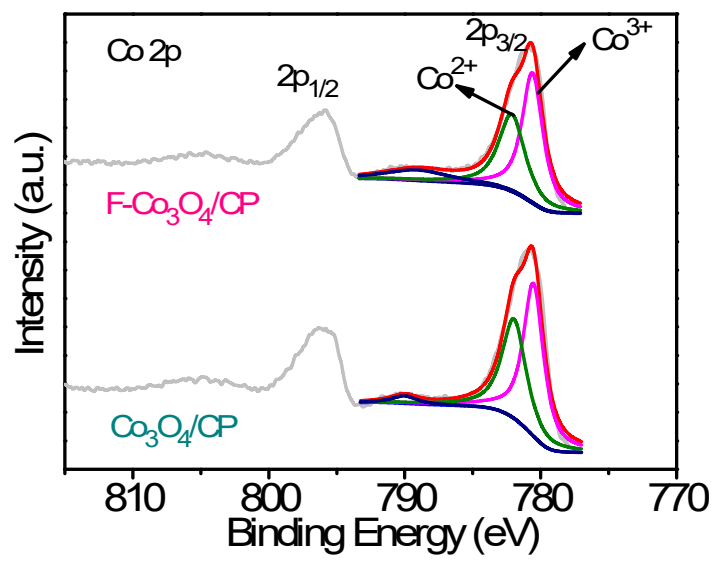

Fig. S19. Co 2p XPS spectra of F-Co<sub>3</sub>O<sub>4</sub>/CP and Co<sub>3</sub>O<sub>4</sub>/CP.

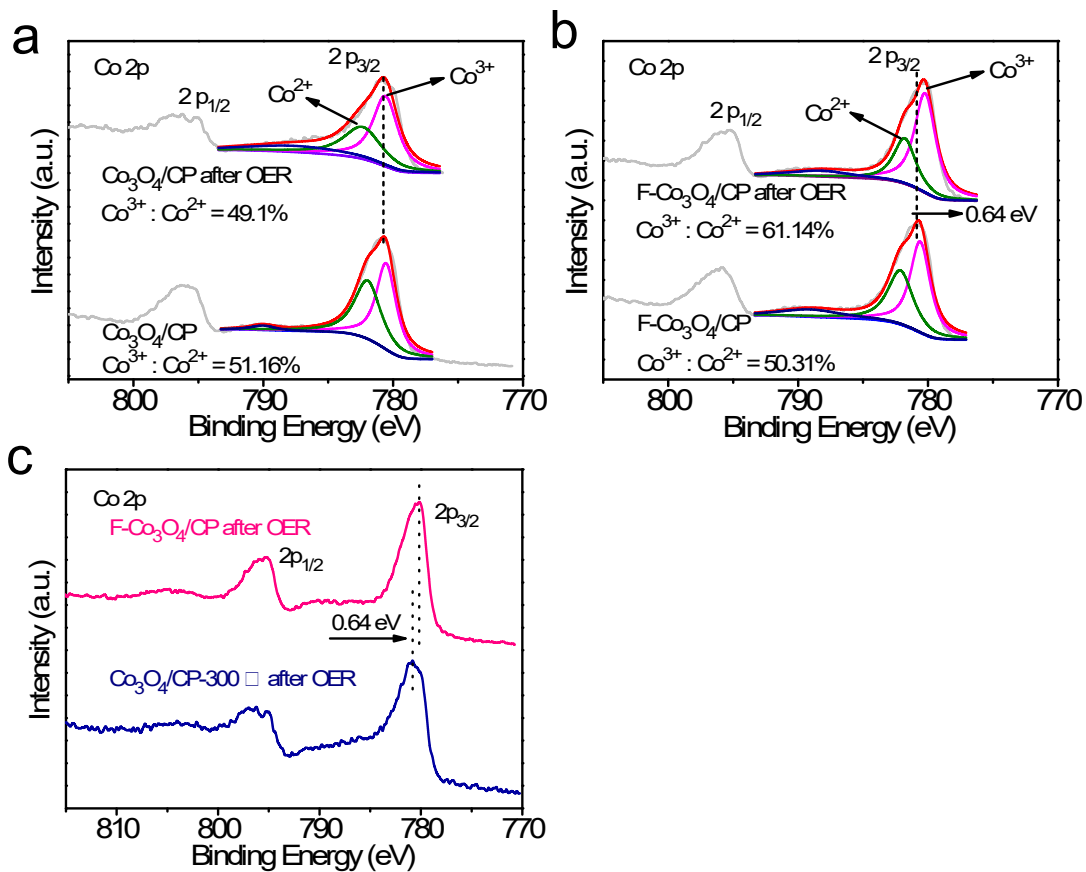

**Fig. S20.** Co 2p XPS spectra of  $F-Co_3O_4/CP$ ,  $Co_3O_4/CP$ ,  $F-Co_3O_4/CP$  after OER and  $Co_3O_4/CP$  after OER.



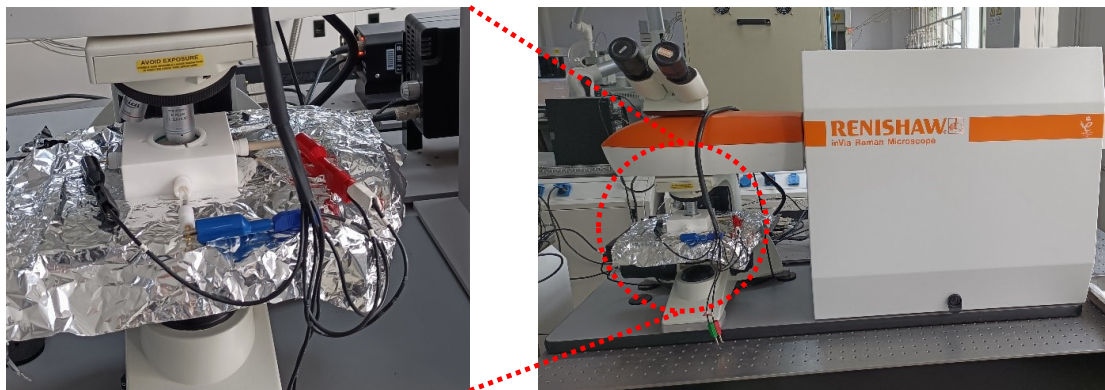

**Fig. S21.** Operando Raman system.

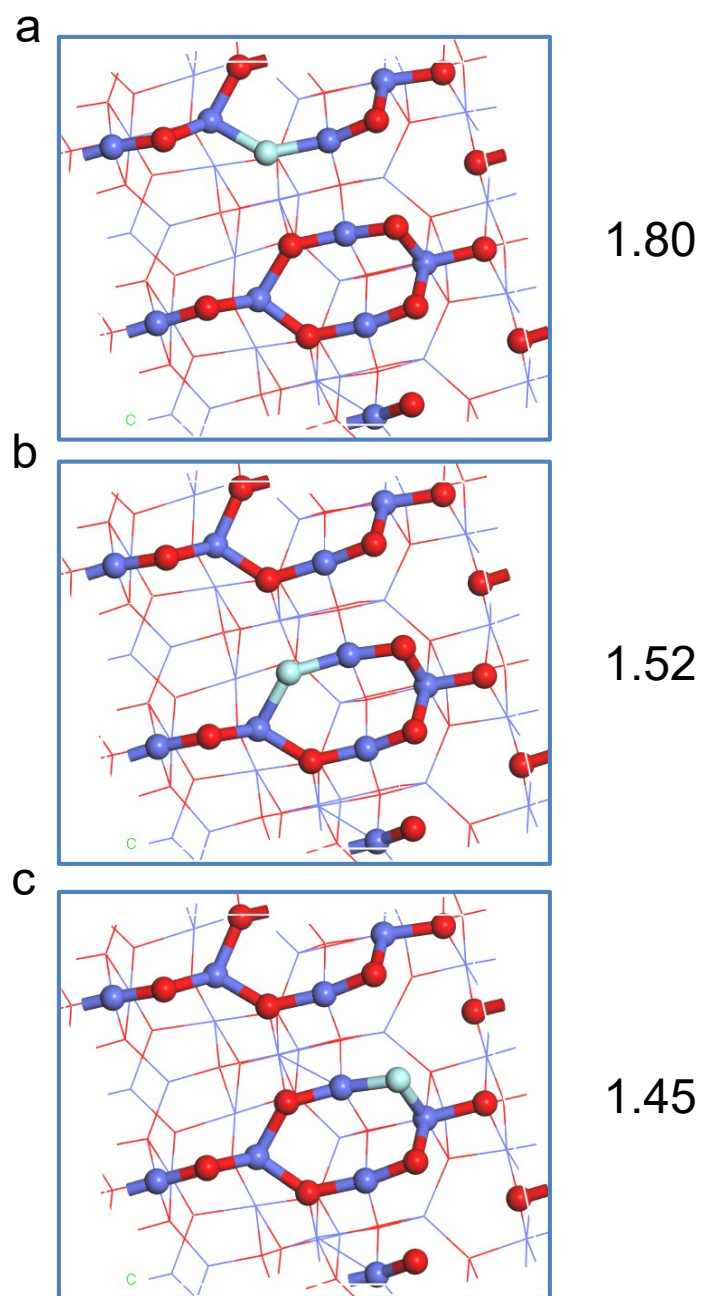

**Fig. S22.** The different substitution positions of F in  $\text{Co}_3\text{O}_4$  (311) (Formation energy), where c is the optimal replacement for F(the atomic ratio of F and O is 1:13).

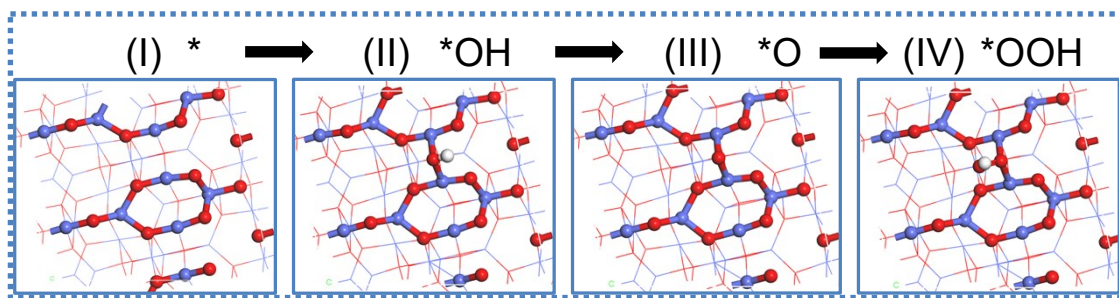

**Fig. S23.** Schematic representation of OER process for  $\text{Co}_3\text{O}_4/\text{CP}$ .

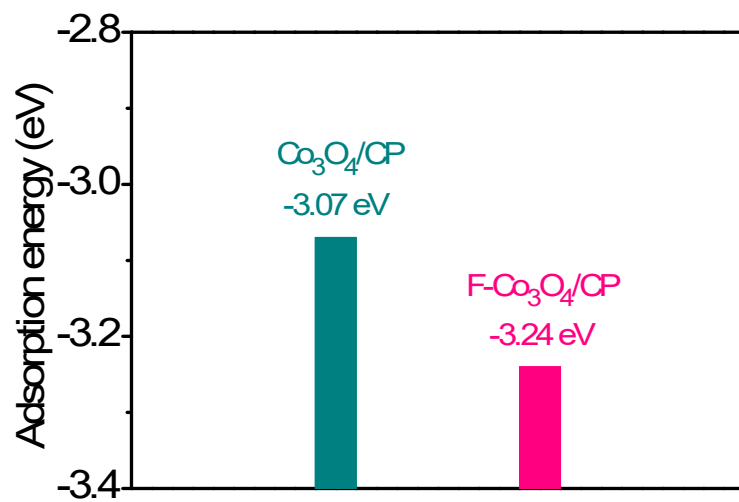

Fig. S24. Adsorption energies of OH on Co<sub>3</sub>O<sub>4</sub>/CP and F-Co<sub>3</sub>O<sub>4</sub>/CP.

**Table S1.** Optimum fit parameters of the EIS data for Co<sub>3</sub>O<sub>4</sub>/CP (0.5 M H<sub>2</sub>SO<sub>4</sub>) ( $R_1$ : solution resistance;  $R_2/R_{ct}$ : electrochemical resistance;  $CPE_1$ : low frequency;  $CPE_2$ : high frequency).

| Potential<br>(vs RHE) | $R_1$ ( $\Omega$ ) | $R_2/R_{ct}$ ( $\Omega$ ) | $R_3$ ( $\Omega$ ) | $CPE_1$ (mF) | $CPE_2$ (mF) |
|-----------------------|--------------------|---------------------------|--------------------|--------------|--------------|
| 1.45 V                | 1.869              | 2.985                     | 315.90             | 0.02037      | 0.03086      |
| 1.50 V                | 1.750              | 2.039                     | 257.30             | 0.02063      | 0.03428      |
| 1.55 V                | 1.746              | 1.631                     | 81.92              | 0.03837      | 0.05313      |
| 1.60 V                | 1.704              | 0.929                     | 15.45              | 0.11480      | 0.15090      |
| 1.65 V                | 1.663              | 0.899                     | 3.70               | 0.06514      | 0.10800      |

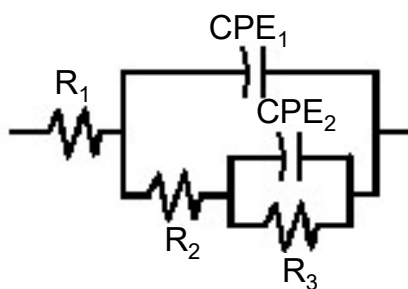

**Table S2.** Optimum fit parameters of the EIS data for F-Co<sub>3</sub>O<sub>4</sub>/CP (0.5 M H<sub>2</sub>SO<sub>4</sub>) ( $R_1$ : solution resistance;  $R_2/R_{ct}$ : electrochemical resistance;  $CPE_1$ : low frequency;  $CPE_2$ : high frequency).

| Potential<br>(vs RHE) | $R_1$ ( $\Omega$ ) | $R_2/R_{ct}$ ( $\Omega$ ) | $R_3$ ( $\Omega$ ) | $CPE_1$ (mF) | $CPE_2$ (mF) |
|-----------------------|--------------------|---------------------------|--------------------|--------------|--------------|
| 1.45 V                | 2.719              | 1.414                     | 1808               | 0.00004      | 0.15190      |
| 1.50 V                | 2.533              | 1.304                     | 14.54              | 0.00003      | 0.21820      |
| 1.55 V                | 2.299              | 1.141                     | 7.83               | 0.00243      | 0.47840      |
| 1.60 V                | 2.264              | 0.943                     | 2.21               | 0.94260      | 1.91900      |
| 1.65 V                | 2.164              | 0.857                     | 1.69               | 21.09000     | 1.71700      |

**Table S3.** Comparison OER performance with other reported transition metal electrocatalysts in acidic media (0.5 M H<sub>2</sub>SO<sub>4</sub>).

| <b>Materials</b>                                                     | <b>Electrolytes</b>                   | <b><math>\eta@10 \text{ mA cm}^{-2}</math><br/>(mV)</b> | <b>Reference<br/>s</b> |
|----------------------------------------------------------------------|---------------------------------------|---------------------------------------------------------|------------------------|
| F-Co <sub>3</sub> O <sub>4</sub>                                     | 0.5 M H <sub>2</sub> SO <sub>4</sub>  | 350 mV                                                  | This work              |
| LMCF                                                                 | 0.5 M H <sub>2</sub> SO <sub>4</sub>  | 353 mV                                                  | 3                      |
| Co <sub>3</sub> O <sub>4</sub> /CeO <sub>2</sub>                     | 0.5 M H <sub>2</sub> SO <sub>4</sub>  | 423 mV                                                  | 4                      |
| P-Co <sub>3</sub> O <sub>4</sub>                                     | 0.5 M H <sub>2</sub> SO <sub>4</sub>  | 400 mV                                                  | 5                      |
| Co <sub>3</sub> O <sub>4</sub>                                       | 0.5 M H <sub>2</sub> SO <sub>4</sub>  | 570 mV                                                  | 6                      |
| Ni <sub>2</sub> Ta                                                   | 0.5 M H <sub>2</sub> SO <sub>4</sub>  | 570 mV                                                  | 7                      |
| Ni <sub>0.5</sub> Mn <sub>0.5</sub> Sb <sub>1.7</sub> O <sub>y</sub> | 1.0 M H <sub>2</sub> SO <sub>4</sub>  | 670 mV                                                  | 8                      |
| NiFeP                                                                | 0.05 M H <sub>2</sub> SO <sub>4</sub> | 540 mV                                                  | 9                      |
| FeN <sub>4</sub> -CNF                                                | 0.5 M H <sub>2</sub> SO <sub>4</sub>  | 294 mV                                                  | 10                     |
| PbO <sub>2</sub> /Co <sub>3</sub> O <sub>4</sub>                     | 1.0 M HClO <sub>4</sub>               | 460 mV                                                  | 11                     |
| Cu <sub>1.5</sub> Mn <sub>1.5</sub> O <sub>4</sub> :10F              | 0.5 M H <sub>2</sub> SO <sub>4</sub>  | 325 mV                                                  | 12                     |
| Mn <sub>0.67</sub> Sb <sub>0.33</sub> O <sub>2</sub>                 | 1.0 M H <sub>2</sub> SO <sub>4</sub>  | 520 mV                                                  | 13                     |
| Co <sub>3</sub> O <sub>4</sub> @C                                    | 0.5 M H <sub>2</sub> SO <sub>4</sub>  | 370 mV                                                  | 14                     |
| Ag-Co <sub>3</sub> O <sub>4</sub> -1                                 | 0.5 M H <sub>2</sub> SO <sub>4</sub>  | 680 mV                                                  | 15                     |
| Ag-Co <sub>3</sub> O <sub>4</sub> -2                                 | 0.5 M H <sub>2</sub> SO <sub>4</sub>  | 470 mV                                                  | 16                     |
| c-Fe <sub>2</sub> O <sub>3</sub>                                     | 0.5 M H <sub>2</sub> SO <sub>4</sub>  | 650 mV                                                  | 17                     |
| Co <sub>0.05</sub> Fe <sub>0.95</sub> O <sub>y</sub>                 | 0.5 M H <sub>2</sub> SO <sub>4</sub>  | 650 mV                                                  | 18                     |
| F-(Mn <sub>1-x</sub> Nb <sub>x</sub> )O <sub>2</sub>                 | 1.0 M H <sub>2</sub> SO <sub>4</sub>  | 680 mV                                                  | 19                     |

## References

1. T. Zhao, D. Zhong, G. Hao and Q. Zhao, *Appl. Surf. Sci.*, 2023, **607**, 155079.
2. H. Liu, Z. Zhang, J. Fang, M. Li, M. G. Sendeku, X. Wang, H. Wu, Y. Li, J. Ge and Z. Zhuang, *Joule*, 2023, **7**, 558-573.
3. L. Chong, G. Gao, J. Wen, H. Li, H. Xu, Z. Green, J. D. Sugar, A. J. Kropf, W. Xu, X. M. Lin, H. Xu, L. W. Wang and D. J. Liu, *Science*, 2023, **380**, 609-616.
4. J. Huang, H. Sheng, R. D. Ross, J. Han, X. Wang, B. Song and S. Jin, *Nat. Commun.*, 2021, **12**, 3036.
5. F. Shang, H. He, P. Li, H. Cai, B. An, X. Li, S. Yang, Z. Sun and B. Wang, *J. Colloid Interface Sci.*, 2023, **641**, 329-337.
6. J. S. Mondschein, J. F. Callejas, C. G. Read, J. Y. C. Chen, C. F. Holder, C. K. Badding and R. E. Schaak, *Chem. Mater.*, 2017, **29**, 950-957.
7. J. S. Mondschein, K. Kumar, C. F. Holder, K. Seth, H. Kim and R. E. Schaak, *Inorg. Chem.*, 2018, **57**, 6010-6015.
8. I. A. Moreno-Hernandez, C. A. MacFarland, C. G. Read, K. M. Papadantonakis, B. S. Brunshwig and N. S. Lewis, *Energy Environ. Sci.*, 2017, **10**, 2103-2108.
9. F. Hu, S. Zhu, S. Chen, Y. Li, L. Ma, T. Wu, Y. Zhang, C. Wang, C. Liu, X. Yang, L. Song, X. Yang and Y. Xiong, *Adv. Mater.*, 2017, **29**, 1606570.
10. C. Lei, H. Chen, J. Cao, J. Yang, M. Qiu, Y. Xia, C. Yuan, B. Yang, Z. Li, X. Zhang, L. Lei, J. Abbott, Y. Zhong, X. Xia, G. Wu, Q. He and Y. Hou, *Adv. Energy Mater.*, 2018, **8**, 1801912.



11. M. Musiani, *Chem. Commun.*, 1996, **21**, 2403-2404.
12. P. P. Patel, M. K. Datta, O. I. Velikokhatnyi, R. Kuruba, K. Damodaran, P. Jampani, B. Gattu, P. M. Shanthi, S. S. Damle and P. N. Kumta, *Sci. Rep.*, 2016, **6**, 28367.
13. L. Zhou, A. Shinde, J. H. Montoya, A. Singh, S. Gul, J. Yano, Y. Ye, E. J. Crumlin, M. H. Richter, J. K. Cooper, H. S. Stein, J. A. Haber, K. A. Persson and J. M. Gregoire, *ACS Catal.*, 2018, **8**, 10938-10948.
14. X. Yang, H. Li, A. Y. Lu, S. Min, Z. Idriss, M. N. Hedhili, K. W. Huang, H. Idriss and L. J. Li, *Nano Energy*, 2016, **25**, 42-50.
15. K. L. Yan, J. Q. Chi, J. Y. Xie, B. Dong, Z. Z. Liu, W. K. Gao, J. H. Lin, Y. M. Chai and C. G. Liu, *Renew. Energy*, 2018, **119**, 54-61.
16. K. L. Yan, J. F. Qin, J. H. Lin, B. Dong, J. Q. Chi, Z. Z. Liu, F. N. Dai, Y. M. Chai and C. G. Liu, *J. Mater. Chem. A*, 2018, **6**, 5678-5686.
17. W. L. Kwong, C. C. Lee, A. Shchukarev, E. Björn and J. Messinger, *J. Catal.*, 2018, **365**, 29-35.
18. W. L. Kwong, C. C. Lee, A. Shchukarev and J. Messinger, *Chem. Commun.*, 2019, **55**, 5017-5020.
19. S. D. Ghadge, O. I. Velikokhatnyi, M. K. Datta, P. M. Shanthi, S. Tan and P. N. Kumta, *ACS Appl. Energy Mater.*, 2020, **3**, 541-557.
